# Supplementary material for: Hepatic and Gill Effects of Heavy Metals in Cichlid Fishes: A Systematic Review Based on In Situ Studies
Source: Preprints.org preprint supplement (doi:10.20944/preprints202404.0370.v1), 2024-04-04
Supplement: Supplementary file 3 [file supplementary]

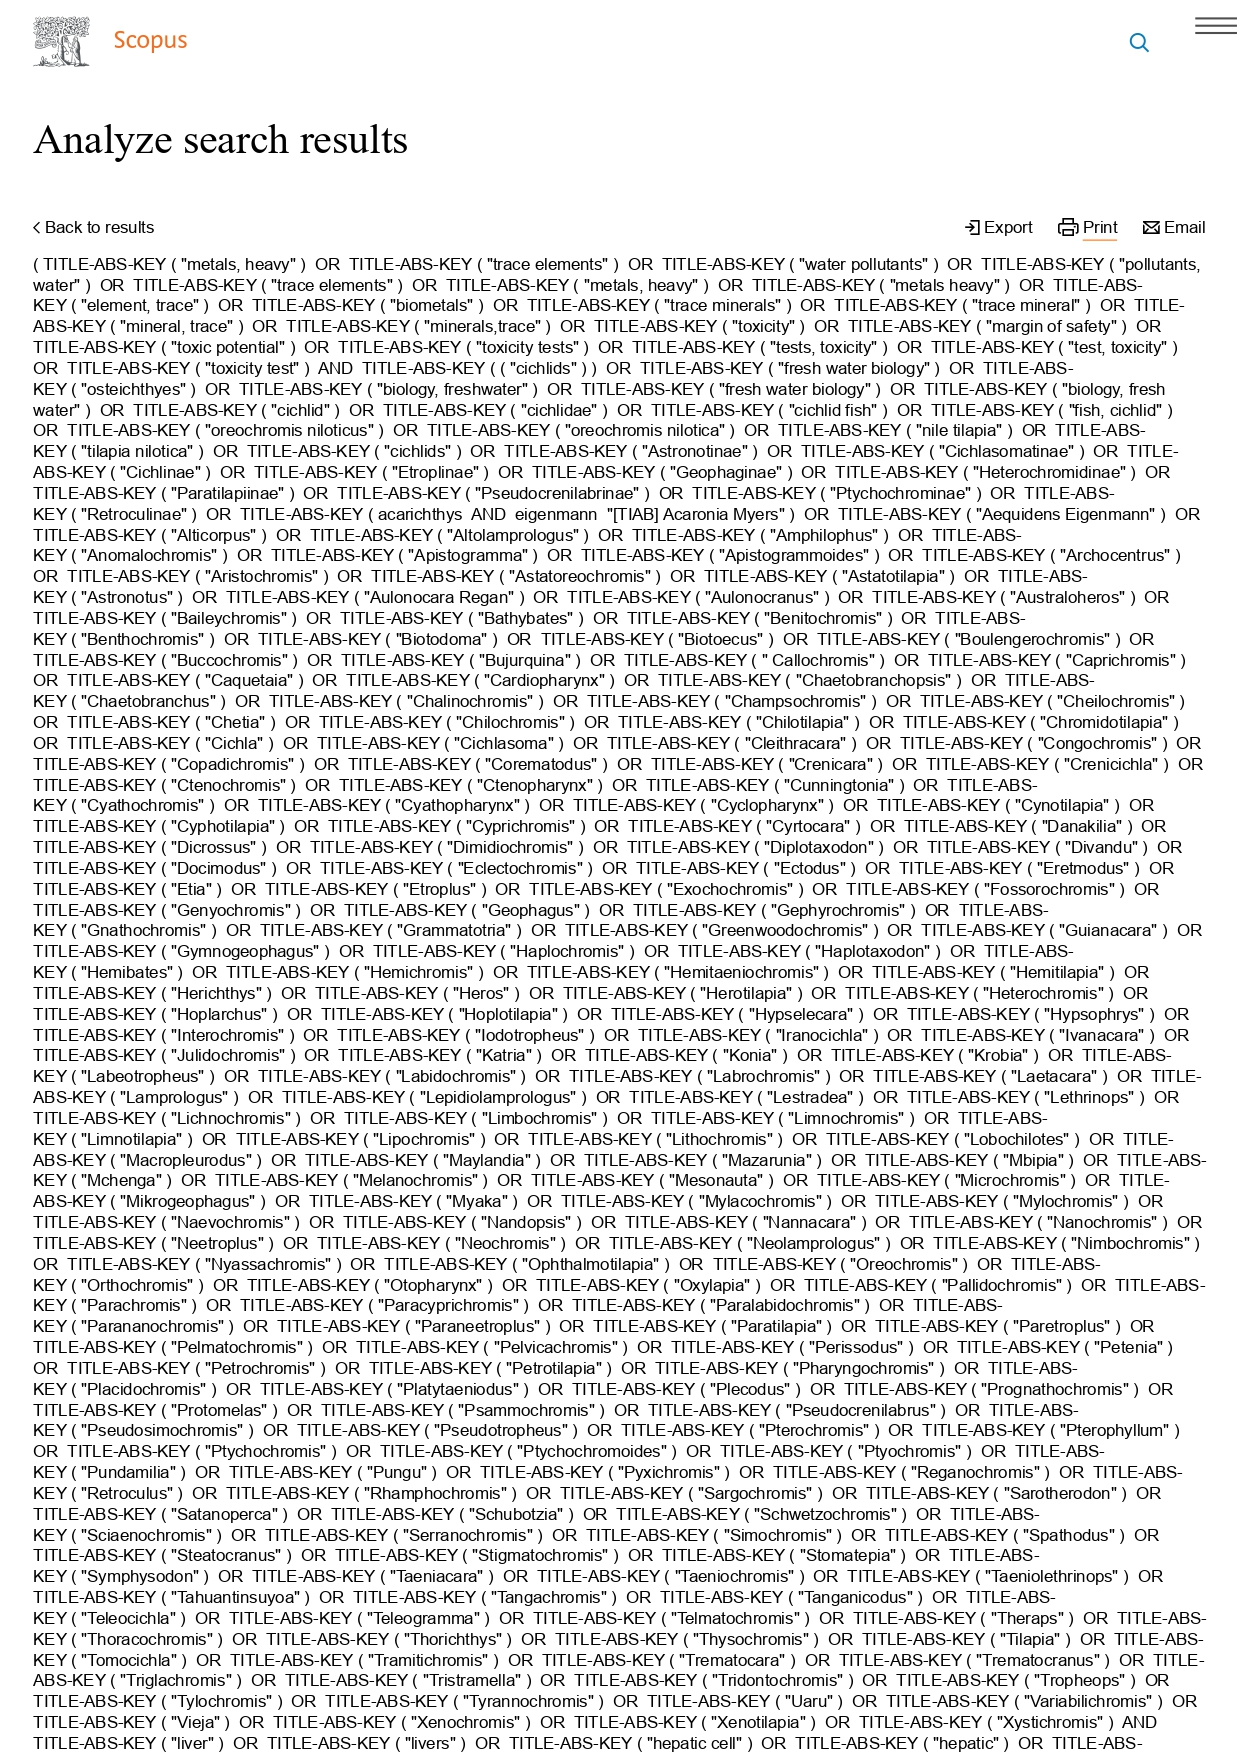


Descriptors used in search platforms Scopus


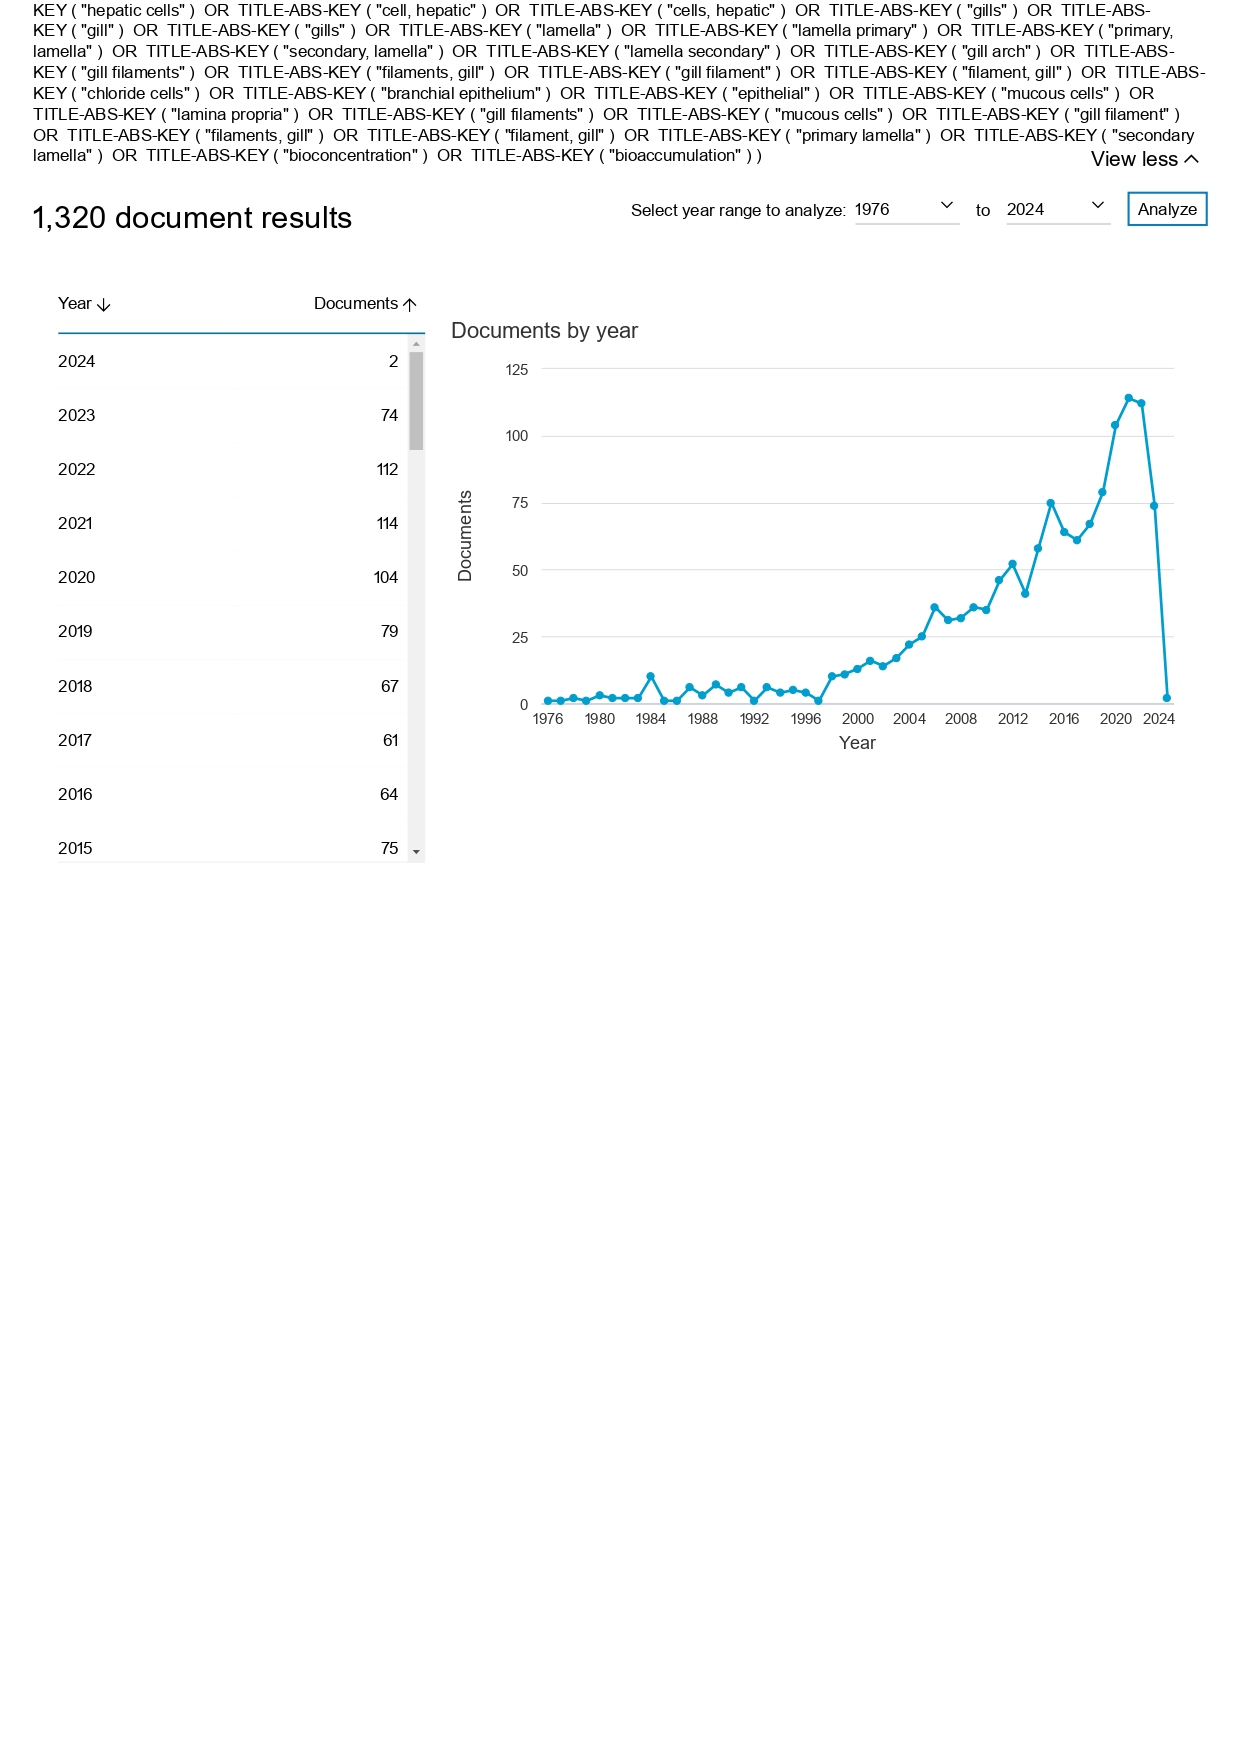


**Table 1.** – Características dos estudos que analisaram os efeitos da exposição à metais pesados em fígado e brânquias de ciclídeos coletados no ambiente.

| **References** | **Country** | **Species** | **Weight (g)/ Size (cm)** | **Number of animals** | **Groups of animals** | **Collection Period/ Station** | **|Analysis** | **Metals** | **Tissues** |
| --- | --- | --- | --- | --- | --- | --- | --- | --- | --- |
| **El-Demerdash and Elagamy, 1999**  [30] | Egypt | *Tilapia nilótica*  *(Oreochromis nilótica)* | 200-250/ 15-20 | 20 | Test + Control | Yes/ ? | Metals in tissues and water, oxidative status, biochemical markers | Cd, Hg | Liver, Brain |
| **Rashed, 2001(a)**  [31] | Egypt | *Tilapia nilótica*  *(Oreochromis nilótica)* | 440-1020/ ? | 50 | Tests (animal ages) | ? | Metals in tissues, water, sediment and aquatic plant | Co, Cr, Cu, Fe, Mn, Ni, Sr, Zn | Liver, Gills, Muscle, Stomach, Intestine, Vertebral Column, Scales |
| **Rashed, 2001(b)**  [18] | Egypt | *Tilapia nilótica*  *(Oreochromis nilótica)* | 440-1020/ ? | 50 | Tests (animal ages) + Control | ? | Metals in tissues, water, sediment and aquatic plant | Pb, Cd | Liver, Gills, Muscle, Stomach, Intestine, Vertebral Column, Scales |
| **Elghobashy *et al*, 2001**  [32] | Egypt | *Oreochromis niloticus* | 150 ± 5/ ? | 30 | Tests (collection sites) + Control | Yes/ Summer | Metals in tissues, metals and physical-chemical parameters in water, oxidative status, biochemical markers | Fe, Cu, Zn, Pb, Cd | Liver, Gills, Kidney, Muscle |
| **Adham *et al*, 2001**  [33] | Egypt | *Oreochromis niloticus* | 150 ± 16,0/ 14,00 ± 1,4 | 200 | Tests (collection sites) + Control | Yes/ Fall-Winter, Spring-Summer | Metals and physical-chemical parameters in water, histopathology, biochemical markers | Pb, Cu, Mn, Zn, Fe, Ni, Hg | Liver, Gills, Blood |
| **Youssef *et al*, 2004**  [34] | Egypt | *Oreochromis spp/ Sarotherodon galilaues* | *O. niloticus*: 60-431/ 14,5-27  *S. galilaeus*: 3,6-37,5/ 8,0-11,5 *O. oreus*: 21-151,8/ 10.5-20 | ? | Tests (animal species) | ? | Metals in tissues | Cu, Zn, Fe, Mn, Cd | Liver, Gills, Kidney, Muscle, Brain, Gonad |
| **Al-Kahtani, 2009**  [35] | Arabia | *Oreochromis niloticus* | 40-60/ 12-19 | ? | Tests (collection stations) | Yes/ Fall, Winter, Spring, Summer | Metals in tissues, metals and physical-chemical parameters in water | Fe, Zn, Cu, Pb, Mn, Cd | Liver, Muscle |
| **Abdel-Baki *et al*, 2011**  [36] | Saudi Arabia | *Tilapia nilótica*  *(Oreochromis nilótica)* | ?/ ? | 10 | Test | Yes/ Summer | Metals in tissues and water | Pb, Cd, Hg, Cu, Cr | Liver, Kidney, Intestine, Gills, Muscle |
| **Muisa *et al*, 2011**  [37] | Zimbabwe | *Oreochromis niloticus* | ?/ ? | ? | Tests (collection periods and sites) | Yes/ 2 periods | Metals in tissues, water and sediment | Al | Liver, Gills, Muscle, Kidney |
| **Abdel-Moneim *et al*, 2012(a)**  [38] | Egypt | *Oreochromis niloticus* | 85-150/ 18-25 | 108 | Tests (collection sites) + Control | Yes/ ? | Metals in water, histopathology, oxidative status | Cd, Cu, Fe, Mn, Pb, Zn, Cr, Hg, Co, Ni | Gills |
| **Abdel-Moneim *et al*, 2012(b)**  [39] | Saudi Arabia | *Oreochromis niloticus* | 90-130/ 18-22 | 120 | Tests (collection sites) | Yes/ ? | Metals and physical-chemical parameters in water, histopathology | Fe, Mn, Zn, Cu, Ni, Cd, Pb, Cr, Co, Hg | Liver, Gills |
| **Cyrille *et al*, 2012**  [40] | Ivory Coast | *Sarotherodon melanotheron* | Juvenile: 15,1-15,8/ ? Adult: 19,5-25,0/ ? | 15 | Tests (juvenile and adult animals) | Yes/ Dry, Rainy, Swelling | Metals in tissues, water physical-chemical parameters | Cd | Liver, Gills, Muscle |
| **Carvalho *et al*, 2012**  [41] | Brazil | *Oreochromis niloticus* | 90-200/ 15-20 | 32 | Tests (collection stations) + Control | Yes/ Fall, Winter, Spring, Summer | Metals and physical-chemical parameters in water, oxidative status, biochemical markers | Cr, Cd, Cu, Zn, Mn, Fe | Liver, Gills, Muscle |
| **Coulibaly *et al*, 2012**  [42] | Ivory Coast | *Sarotherodon melanotheron* | ?/ ? | 60 | Tests (collection stations) | Yes/ Dry, Rainy, Swelling | Metals in tissues, water and sediment | Cd, Cu, Pb, Hg, Zn | Liver, Kidney, Muscle, Brain |
| **Abdel-Moneim *et al*, 2013a**  [43] | Egypt | *Oreochromis niloticus* | 125-210/ 20-26 | 120 | Test + Control | Yes/ ? | Metals in tissues and water, oxidative status, histopathology | Cd, Cu, Fe, Pb, Zn, Mn | Liver |
| **Abdel-Moneim, 2013b**  [44] | Saudi Arabia | *Oreochromis niloticus* | 75-152/ 15-21 | ? | Tests (collection sites) + Control | Yes/ ? | Metals in water, histopathology | Ni, Fe, Zn, Co, Ba, Pb, Cu, Cd | Liver |
| **Jinadasa and Edirisinghe, 2014**  [45] | Sri Lanka | *Tilapia sp* | 216.6 ± 162,1/ 21,1 ± 4,0 | 80 | Tests (collection sites) | ? | Metals in tissues | Cd, Pb, Hg | Liver, Gills, Muscle |
| **Mohamed and Osman, 2014**  [46] | Sudan | *Oreochromis niloticus* | ?/ ~13 | ? | Tests (collection sites) | ? | Metals in tissues and water | Cd, Cr, Ni, Pb, Cu, Zn, Fe, Sr | Muscle, Gills |
| **Voigt *et al*, 2014**  [47] | Brazil | *Geophagus brasiliensis* | Male: 59,5-278,0/ 145-250  Female: 64,6-145,4/ 150-190 | Male:38  Female:17 | Tests (gender, weight and size of animals) | Yes/ Summer | Metals in tissues, water and sediment | Cu, Mn, Zn, Fe, Co, Cd, Cr, Ag, Ni | Liver, Gills, Muscle |
| **Abdel-Khalek, 2014**  [48] | Egypt | *Oreochromis niloticus* | 160-180/ 18,5-24,8 | 36 | Tests (collection sites) + Contol | Yes/ Summer | Metals in tissues and water, histopathology | Cu, Zn, Pb, Fe, Mn, Cd | Liver, Gills, Kidney, Muscle |
| **Abdel-Khalek, 2015**  [49] | Egypt | *Oreochromis niloticus* | 160-180/ 18,5-24,8 | 36 | Tests (collection sites) + Control | Yes/ Summer | Metals and physical-chemical parameters in water, oxidative status | Cu, Zn, Pb, Fe, Mn, Cd | Liver, Gills, Blood |
| **Ajima *et al*, 2015**  [50] | Nigeria | *Pelmatochromis guentheri/*  *Pelmatochromis pulcher* | 35 ± 0,05/ ? | 18 | Tests (animal species) | ? | Metals in tissues, water and sediment | Pb, Zn, Cd, Cu, Fe | Gills, Muscle, Intestine |
| **Ruelas-Inzunza *et al*, 2015**  [51] | Mexico | *Oreochromis aureus* | Rainy station: 506,8 ± 100,5/ 30,9±2,4 Dry station: 563,4 ± 93,9/ 31,0±2,8 | 80 | Tests (collection stations) | Yes/ Dry,  Rainy | Metals in tissues | Hg | Liver, Muscle, Kidney |
| **Kumar *et al*, 2016**  [52] | India | *Oreochromis mossambicus* | ? | 54 | Tests (collection sites) | Yes/ ? | Metals in muscle, histopathology, oxidative status, biochemical markers | Cr, Mn, Co, Ni, Cu, Zn, As, Se, Cd, Hg, Pb | Liver, Gills, Kidney, Muscle, Brain, Gonad |
| **Mbewe *et al*, 2016**  [53] | Zambia | *Tilapia andersonii/*  *T. rendalli/*  *Oreochromis niloticus* | *T.rendalli*: 170-250/ ?  *O.niloticus*: 150-300/ ? T*.andersonii*: 390/ ? | 3/ 4/ 3 | Tests (animal species and collection sites) | Yes/ ? | Metals in tissues and sediment | Cu, Cd, Pb, Mn, Cr, Ni, Fe | Liver, Gonads, Muscle, Intestines, Head. |
| **Doria *et al*, 2017**  [54] | Brazil | *Geophagus brasiliensis* | 148,8 ± 8,89/ 19,97 ± 2,87 | 55 | Tests (collection sites) | Yes/ Summer | Metals in tissues, histopathology, oxidative status, biochemical markers | Cu, Mn, Zn, Co, Cd, Cr, Ag, Pb, Ni, Al, As | Liver, Gills, Blood, Muscle, Brain |
| **Kumar e*t al*, 2017**  [55] | India | *Oreochromis mossambicus* | ?/ ? | ? | Tests (collection sites) | Yes/ ? | Metals in tissues, water and sediment, oxidative status, biochemical markers | Cr, Mn, Co, Ni, Cu, Zn, As, Se, Cd, Hg, Pb | Liver, Gills, Kidney, Muscle, Brain, Gonad |
| **Muñoz-Nájera e*t al*, 2018**  [56] | Mexico | *Oreochromis niloticus* | ?/ ? | 150 | Tests (collection periods) | Yes/ 5 periods | Metals in tissues, metals and physical-chemical parameters in water, biochemical markers | Cd, Cr, Cu, Pb | Liver, Muscle |
| **Pettamanna; Raghav; Nair, 2020**  [57] | Índia | *Etroplus suratensis* | 65,7-83,1/11-14,5 | 15 | Test + Control | Yes/Winter | Metals and physical-chemical parameters in water, histopathology, biochemical markers | Cu, Fe | Liver |
| **Martínez-Durazo** ***et al*, 2020**  [58] | Mexico | *Tilapia nilótica*  *(Oreochromis niloticus)*  *Largemouth bass*  *(Micropterus*  *salmoides)* | 461,8-619,6/26,98-34,51  45,1-1.182,0/30,17-40,10 | 21-30  21-30 | Tests (animal species) | Yes/Dry and Rainy | Metals in tissues. | Cr, Cu, Fe, Mn, Ni,Zn | Liver, gills, stomach, gonads and muscle |
| **Salem** ***et al*, 2021**  [59] | Egypt | *Tilapia nilótica*  *(Oreochromis nilótica)* | 80±5/17±2 | 16 males | Tests (collection sites) | Yesyear all | Metals in tissues, metals and physical-chemical in water, quantitative, biochemical markers Real‑Time PCR. | Cd, Fe, Mn, Co e Pb | Liver |
| **Ngo *et al*, 2022**  [01] | Vietname | *common Carp (Cyprinus carpio),*  *silver Carp (Hypothalmic molitrix),*  *Tilapia nilótica (Oreochromis niloticus)* | ? | 240/240/240 | Tests (animal species) | Yes/four seasons | Metals in tissues and wate, oxidative status, biochemical markers. | Zn, Cu, Pb, Cd | Livers, kidneys, gills |
| **Páez-Osuna *et al*, 2022**  [60] | Mexico | *Oreochromis aureus* | 200-840/22.2-41.3 | 15 | Tests (collection periods) | Yes/spring | Metals in tissues, sediments, metals and physical-chemical parameters in water and risk assessment. | As, Cd, Cu, Hg, Se, Zn | Liver, muscle, and guts |
| **Vieira *et al*, 2023**  [61] | Brazil | *Tucunare (Cichla* sp*).*  *Piraíba (Braquiplatystoma filamentosum)*  *Jaraqui (Semaprochilodus* sp) | ? | 10/10/10 | Tests (animal species) | ? | Metals in tissues, oxidative status, biochemical markers and bioinformatic. | Hg | Liver, muscle |
| **Martínez-Durazo** ***et al*, 2023**  [6] | Mexico | *Tilapia nilótica*  *(Oreochromis niloticus)*  *Largemouth bass*  *(Micropterus*  *salmoides* | ? | 20/20/20 | Tests (animal species) + control | Yes/Dry and Rainy | Metals in tissues, histopathology. | Cr, Cu, Fe, Mn Ni, Zn, As, Hg, Se. | Liver, gills, muscle, gonads |
| **Páez‑Osuna, *et al*, 2023**  [62] | Mexico | *Carpa mon*  *(Cyprinus carpio)*  *Tilápia azul*  *(Oreochromis aureus)*  *Robalo*  *(Micropterus*  *salmoides)* | *C.carpio*  36,5-47/625/1.725  *O. aureus*  21-34/165-670  *M. salmoides*  24-38/170/740 | 7/22/16 | Tests (animal species) | ? | Metals in tissues, risk assessment. | As, Cd, Cu, Zn | Liver, gills, muscle, guts |

**Table 1.** Legenda: Ag: Silver; Al: aluminum; As: Arsênico; Ba: Barium; Ni Cd: Cadmium; Co: Cobalt; Cr: Chrome; Cu: Copper; Se: Selenium; Fe: Iron; Hg: Mercury; Mn: Manganese; Mo: Molybdenum; Nickel; Pb: Lead; Se: Selênio; Sr: Strontium; Zn: Zinc; ?: uninformed.

**Table 2** – Resultados primários dos estudos sobre efeitos de metais pesados na histologia e no *status* oxidativo branquial e hepática de peixes ciclídeos em ambientes contaminados.

| **Metais pesados** |  | **Órgãos** | **Danos histológicos** | **Estresse Oxidativo** | |
| --- | --- | --- | --- | --- | --- |
| Cd |  | Fígado  (n=5) | ↑necrose, esteatose, lipidose, hiperemia, hemorragia, congestão, neoplasia, diferenciação celular, vacuolização citoplasmática e nuclear, degeneração citoplasmática e nuclear, núcleo picnótico, eosinófilos e infiltrados leucocitários. | MDA:↑  SOD: ↓  GSH:↑  GST:↑  GPx: ↓  CAT: ↓  LPO:↑  PCO: ↑ | |
| Brânquia  (n=3) | ↑ hiperplasia, hipertrofia, dilatação vascular, levantamento do epitélio, fusão lamelar, desorganização lamelar, congestão, aneurisma, fusão lamelar e ruptura das células de cloreto. | MDA: ↑  SOD: ↑  GSH: ↑  GST: ↑  GR: ↓  GPx: ↓  CAT: ↓  LPO: ↑  G6PD:↓ | |
| Cu |  | Fígado  (n=8) | ↑ necrose, esteatose, lipidose, hiperemia, hemorragia, congestão, neoplasia, diferenciação tecidual, vacuolização citoplasmática e nuclear, degeneração citoplasmática e nuclear, núcleo picnótico, eosinófilos e infiltrados leucocitários. | MDA:↑  SOD: ↓  GSH:↑  GST:↑  GPx: ↓  CAT: ↓  LPO:↑  PCO: ↑ | |
| Brânquia  (n=5) | ↑ Hiperplasia, hipertrofia, dilatação vascular, levantamento do epitélio, fusão lamelar, desorganização lamelar, congestão, aneurisma, fusão lamelar e ruptura das células de cloreto. | MDA: ↑  SOD: ↑  GSH: ↑  GST: ↑  GR: ↓  GPx: ↓  CAT: ↓  LPO: ↑  G6PD:↓ | |
| Pb |  | Fígado  (n=6) | ↑ necrose, esteatose, lipidose, hiperemia, hemorragia, congestão, neoplasia, diferenciação tecidual, vacuolização citoplasmática e nuclear, degeneração citoplasmática e nuclear, núcleo picnótico.  ↑ Eosinófilos e infiltrados leucocitários. | MDA:↑  SOD: ↓  GSH:↑  GST:↑  GPx: ↓  CAT: ↓  LPO:↑  PCO: ↑ | |
| Brânquia  (n=4) | ↑ Hiperplasia, hipertrofia, dilatação vascular, levantamento do epitélio, fusão lamelar, desorganização lamelar, congestão, aneurisma, fusão lamelar e ruptura das células de cloreto. | MDA: ↑  SOD: ↑  GSH: ↑  GST: ↑  GR: ↓  GPx: ↓  CAT: ↓  LPO: ↑  G6PD:↓ | |
| Zn |  | Fígado  (n=7) | ↑ necrose, esteatose, lipidose, hiperemia, hemorragia, congestão, neoplasia, diferenciação tecidual, vacuolização citoplasmática e nuclear, degeneração citoplasmática e nuclear, núcleo picnótico.  ↑ Eosinófilos e infiltrados leucocitários. | MDA:↑  SOD: ↓  GSH:↑  GST:↑  GPx: ↓  CAT: ↓  LPO:↑  PCO: ↑ | |
| Brânquia  (n=5) | ↑ Hiperplasia, hipertrofia, dilatação vascular, levantamento do epitélio, fusão lamelar, desorganização lamelar, congestão, aneurisma, fusão lamelar e ruptura das células de cloreto. | MDA: ↑  SOD: ↑  GSH: ↑  GST: ↓  GR: ↓  GPx: ↓  CAT: ↓  LPO: ↑  G6PD:↓ | |
| Mn |  | Fígado  (n=7) | ↑ necrose, esteatose, lipidose, hiperemia, hemorragia, congestão, neoplasia, diferenciação tecidual, vacuolização citoplasmática e nuclear, degeneração citoplasmática e nuclear, núcleo picnótico.  ↑ Eosinófilos e infiltrados leucocitários. | MDA:↑  SOD: ↓  GSH:↑  GST:↑  GPx: ↓  CAT: ↓  LPO:↑  PCO: ↑ | |
| Brânquia  (n=5) | ↑ Hiperplasia, hipertrofia, dilatação vascular, levantamento do epitélio, fusão lamelar, desorganização lamelar, congestão, aneurisma, fusão lamelar e ruptura das células de cloreto. | MDA: ↑  SOD: ↑  GSH: ↑  GST: ↑  GR: ↓  GPx: ↓  CAT: ↓  LPO: ↑  G6PD:↓ | |
| Fe |  | Fígado  (n=6) | ↑ necrose, esteatose, lipidose, hiperemia, hemorragia, congestão, neoplasia, diferenciação tecidual, vacuolização citoplasmática e nuclear, degeneração citoplasmática e nuclear, núcleo picnótico.  ↑ Eosinófilos e infiltrados leucocitários. | MDA:↑  SOD: ↓  GSH:↑  GST:↑  GPx: ↓  CAT: ↓  LPO:↑  PCO: ↑ | |
| Brânquia  (n=3) | ↑ Hiperplasia, hipertrofia, dilatação vascular, levantamento do epitélio, fusão lamelar, desorganização lamelar, congestão, aneurisma, fusão lamelar e ruptura das células de cloreto. | MDA: ↑  SOD: ↑  GSH: ↑  GST: ↑  GR: ↓  GPx: ↓  CAT: ↓  LPO: ↑  G6PD:↓ | |
| Cr |  | Fígado  (n=5) | ↑ necrose, esteatose, lipidose, hiperemia, hemorragia, congestão, neoplasia, diferenciação tecidual, vacuolização citoplasmática e nuclear, degeneração citoplasmática e nuclear, núcleo picnótico.  ↑ Eosinófilos e infiltrados leucocitários. | MDA:↑  SOD: ↓  GSH:↑  GST:↑  GPx: ↓  CAT: ↓  LPO:↑  PCO: ↑ | |
| Brânquia  (n=3) | ↑ Hiperplasia, hipertrofia, dilatação vascular, levantamento do epitélio, fusão lamelar, desorganização lamelar, congestão, aneurisma, fusão lamelar e ruptura das células de cloreto. | MDA: ↑  SOD: ↑  GSH: ↑  GST: ↑  GR: ↓  GPx: ↓  CAT: ↓  LPO: ↑  G6PD:↓ | |
| Hg |  | Fígado  (n=5) | ↑ necrose, esteatose, lipidose, hiperemia, hemorragia, congestão, neoplasia, diferenciação tecidual, vacuolização citoplasmática e nuclear, degeneração citoplasmática e nuclear, núcleo picnótico.  ↑ Eosinófilos e infiltrados leucocitários. | MDA:↑  SOD: ↓  GSH:↑  GST:↑  GPx: ↓  CAT: ↓  LPO:↑  PCO: ↑ | |
| Brânquia  (n=3) | ↑ Hiperplasia, hipertrofia, dilatação vascular, levantamento do epitélio, fusão lamelar, desorganização lamelar, congestão, aneurisma, fusão lamelar e ruptura das células de cloreto. | MDA: ↑  SOD: ↑  GSH: ↑  GST: ↑  GR: ↓  GPx: ↓  CAT: ↓  LPO: ↑  G6PD:↓ | |
| Ni |  | Fígado  (n=6) | ↑ necrose, esteatose, lipidose, hiperemia, hemorragia, congestão, neoplasia, diferenciação tecidual, vacuolização citoplasmática e nuclear, degeneração citoplasmática e nuclear, núcleo picnótico.  ↑ Eosinófilos e infiltrados leucocitários. | MDA:↑  SOD: ↓  GSH:↑  GST:↑  GPx: ↓  CAT: ↓  LPO:↑  PCO: ↑ | |
| Brânquia  (n=4) | ↑ Hiperplasia, hipertrofia, dilatação vascular, levantamento do epitélio, fusão lamelar, desorganização lamelar, congestão, aneurisma, fusão lamelar e ruptura das células de cloreto. | MDA: ↑  SOD: ↑  GSH: ↑  GST: ↑  GR: ↓  GPx: ↓  CAT: ↓  LPO: ↑  G6PD:↓ | |
| Co |  | Fígado  (n=4) | ↑ necrose, esteatose, lipidose, hiperemia, hemorragia, congestão, neoplasia, diferenciação tecidual, vacuolização citoplasmática e nuclear, degeneração citoplasmática e nuclear, núcleo picnótico.  ↑ Eosinófilos e infiltrados leucocitários. | MDA:↑  SOD: ↓  GSH:↑  GST:↑  GPx: ↓  CAT: ↓  LPO:↑  PCO: ↑ | |
| Brânquia  (n=2) | ↑ Hiperplasia, hipertrofia, dilatação vascular, levantamento do epitélio, fusão lamelar, desorganização lamelar, congestão, aneurisma, fusão lamelar e ruptura das células de cloreto. | MDA: ↑  SOD: ↑  GSH: ↑  GST: ↑  GR: ↓  GPx: ↓  CAT: ↓  LPO: ↑  G6PD:↓ | |
| Ag |  | Fígado  (n=1) | ↑ necrose, esteatose, hemorragia, congestão, diferenciação tecidual.  . | - | |
| Brânquia  (n=1) | ↑ Hiperplasia, fusão lamelar, aneurisma, parasita, descamação epitelial e necrose. | - | |
| As |  | Fígado  (n=3) | ↑ necrose, esteatose, hemorragia, congestão, diferenciação tecidual, vacuolização, núcleo picnótico, degeneração citoplasmática e hiperemia.  . | SOD e CAT: ↓  PCO e LPO: ↑ | |
| Brânquia  (n=3) | ↑ Hiperplasia, fusão lamelar, aneurisma, parasita, descamação epitelial e necrose. | - | |
| Al |  | Fígado  (n=1) | ↑ necrose, esteatose, hemorragia, congestão, diferenciação tecidual.  . | SOD e CAT: ↓  PCO e LPO: ↑ | |
| Brânquia  (n=1) | ↑ Hiperplasia, fusão lamelar, aneurisma, parasita, descamação epitelial e necrose. | - | |
| Se |  | Fígado  (n=2) | - | | MDA:↑  SOD: ↓  GSH:↑  GST:↑  GPx: ↓  CAT: ↓  LPO:↑  PCO: ↑ |
| Brânquia  (n=2) | - | |  |

**Table 3:** Descriptors used in search platforms Pubmed

| **PUBMED** | | |
| --- | --- | --- |
| **Heavy Metals** | **Fish** | **Liver and Gill** |
| ("metals, heavy"[MeSH Terms] OR "trace elements"[MeSH Terms] OR "water pollutants"[MeSH Terms] OR "pollutants, water"[TIAB] OR "water pollutants"[TIAB] OR "trace elements"[TIAB] OR "metals, heavy"[ TIAB] OR "metals heavy"[TIAB] OR "metal heavy"[TIAB] OR "element, trace"[TIAB] OR "elements, trace"[TIAB] OR "biometals"[TIAB] OR "biometal"[TIAB] OR "trace minerals"[TIAB] OR "trace mineral"[TIAB] OR "mineral, trace" [TIAB] OR "minerals,trace"[TIAB] OR "toxicity"[TIAB] OR "toxicity"[MeSH Terms] OR "margin of safety"[TIAB] OR "toxic potential"[TIAB] OR "toxicity tests"[MeSH Terms] OR "tests, toxicity"[TIAB] OR "test, toxicity"[TIAB] OR "toxicity test"[TIAB]) | ("cichlids"[MeSH Terms] OR "fresh water biology"[MeSH Terms] OR "osteichthyes" [TIAB] OR "Biology, Freshwater"[TIAB] OR "Fresh Water Biology"[TIAB] OR "Biology, Fresh Water"[TIAB] OR "cichlid"[TIAB] OR "cichlidae"[TIAB] OR "cichlid fish"[TIAB] OR "fish, cichlid"[TIAB] OR "Oreochromis niloticus"[TIAB] OR "Oreochromis nilotica"[TIAB] OR "nile tilapia"[TIAB] OR "tilapia nilotica"[TIAB] OR "cichlids"[TIAB] OR "[Astronotinae](https://pt.wikipedia.org/wiki/Astronotinae)"[TIAB] OR "[Cichlasomatinae](https://pt.wikipedia.org/wiki/Cichlasomatinae)"[TIAB] OR "[Cichlinae](https://pt.wikipedia.org/w/index.php?title=Cichlinae&action=edit&redlink=1)"[TIAB] OR "[Etroplinae](https://pt.wikipedia.org/w/index.php?title=Etroplinae&action=edit&redlink=1)"[TIAB] OR "[Geophaginae](https://pt.wikipedia.org/w/index.php?title=Geophaginae&action=edit&redlink=1)"[TIAB] OR "[Heterochromidinae](https://pt.wikipedia.org/w/index.php?title=Heterochromidinae&action=edit&redlink=1)"[TIAB] OR "[Paratilapiinae](https://pt.wikipedia.org/w/index.php?title=Paratilapiinae&action=edit&redlink=1)"[TIAB] OR "[Pseudocrenilabrinae](https://pt.wikipedia.org/wiki/Tilápia)"[TIAB] OR "[Ptychochrominae](https://pt.wikipedia.org/w/index.php?title=Ptychochrominae&action=edit&redlink=1)"[TIAB] OR "Retroculinae"[TIAB] OR [Acarichthys](https://pt.wikipedia.org/wiki/Acarichthys_heckelii) [Eigenmann](https://pt.wikipedia.org/wiki/Carl_H._Eigenmann)"[TIAB] [Acaronia](https://pt.wikipedia.org/wiki/Acaronia) [Myers](https://pt.wikipedia.org/w/index.php?title=George_S._Myers&action=edit&redlink=1)"[TIAB] OR "[Aequidens](https://pt.wikipedia.org/wiki/Aequidens) [Eigenmann](https://pt.wikipedia.org/wiki/Carl_H._Eigenmann)"[TIAB] OR "[Alticorpus](https://pt.wikipedia.org/w/index.php?title=Alticorpus&action=edit&redlink=1)"[TIAB] OR "[Altolamprologus](https://pt.wikipedia.org/w/index.php?title=Altolamprologus&action=edit&redlink=1)"[TIAB] OR "[Amphilophus](https://pt.wikipedia.org/wiki/Amphilophus)"[TIAB] OR "[Anomalochromis](https://pt.wikipedia.org/w/index.php?title=Anomalochromis&action=edit&redlink=1)"[TIAB] OR "[Apistogramma](https://pt.wikipedia.org/wiki/Apistogramma)"[TIAB] OR "[Apistogrammoides](https://pt.wikipedia.org/w/index.php?title=Apistogrammoides&action=edit&redlink=1)"[TIAB] OR "[Archocentrus](https://pt.wikipedia.org/w/index.php?title=Archocentrus&action=edit&redlink=1)"[TIAB] OR "[Aristochromis](https://pt.wikipedia.org/w/index.php?title=Aristochromis&action=edit&redlink=1)"[TIAB] OR "[Astatoreochromis](https://pt.wikipedia.org/w/index.php?title=Astatoreochromis&action=edit&redlink=1)"[TIAB] OR "Astatotilapia"[TIAB] OR "[Astronotus](https://pt.wikipedia.org/wiki/Astronotus)"[TIAB] OR "[Aulonocara](https://pt.wikipedia.org/wiki/Aulonocara) [Regan](https://pt.wikipedia.org/wiki/Charles_Tate_Regan)"[TIAB] OR "[Aulonocranus](https://pt.wikipedia.org/w/index.php?title=Aulonocranus&action=edit&redlink=1)"[TIAB] OR "[Australoheros](https://pt.wikipedia.org/w/index.php?title=Australoheros&action=edit&redlink=1)"[TIAB] OR "[Baileychromis](https://pt.wikipedia.org/w/index.php?title=Baileychromis&action=edit&redlink=1)"[TIAB] OR "[Bathybates](https://pt.wikipedia.org/w/index.php?title=Bathybates&action=edit&redlink=1)"[TIAB] OR "[Benitochromis](https://pt.wikipedia.org/w/index.php?title=Benitochromis&action=edit&redlink=1)"[TIAB] OR "[Benthochromis](https://pt.wikipedia.org/w/index.php?title=Benthochromis&action=edit&redlink=1)"[TIAB] OR "[Biotodoma](https://pt.wikipedia.org/w/index.php?title=Biotodoma&action=edit&redlink=1)"[TIAB] OR "[Biotoecus](https://pt.wikipedia.org/w/index.php?title=Biotoecus&action=edit&redlink=1)"[TIAB] OR "Boulengerochromis"[TIAB] OR "[Buccochromis](https://pt.wikipedia.org/w/index.php?title=Buccochromis&action=edit&redlink=1)"[TIAB] OR "[Bujurquina](https://pt.wikipedia.org/w/index.php?title=Bujurquina&action=edit&redlink=1)"[TIAB] OR " [Callochromis](https://pt.wikipedia.org/w/index.php?title=Callochromis&action=edit&redlink=1)"[TIAB] OR "[Caprichromis](https://pt.wikipedia.org/w/index.php?title=Caprichromis&action=edit&redlink=1)"[TIAB] OR "[Caquetaia](https://pt.wikipedia.org/w/index.php?title=Caquetaia&action=edit&redlink=1)"[TIAB] OR "[Cardiopharynx](https://pt.wikipedia.org/w/index.php?title=Cardiopharynx&action=edit&redlink=1)"[TIAB] OR "[Chaetobranchopsis](https://pt.wikipedia.org/wiki/Chaetobranchopsis)"[TIAB] OR "[Chaetobranchus](https://pt.wikipedia.org/w/index.php?title=Chaetobranchus&action=edit&redlink=1)"[TIAB] OR "[Chalinochromis](https://pt.wikipedia.org/w/index.php?title=Chalinochromis&action=edit&redlink=1)"[TIAB] OR "[Champsochromis](https://pt.wikipedia.org/w/index.php?title=Champsochromis&action=edit&redlink=1)"[TIAB] OR "[Cheilochromis](https://pt.wikipedia.org/w/index.php?title=Cheilochromis&action=edit&redlink=1)"[TIAB] OR "Chetia"[TIAB] OR "[Chilochromis](https://pt.wikipedia.org/w/index.php?title=Chilochromis&action=edit&redlink=1)"[TIAB] OR "[Chilotilapia](https://pt.wikipedia.org/w/index.php?title=Chilotilapia&action=edit&redlink=1)"[TIAB] OR "[Chromidotilapia](https://pt.wikipedia.org/w/index.php?title=Chromidotilapia&action=edit&redlink=1)"[TIAB] OR "[Cichla](https://pt.wikipedia.org/wiki/Cichla)"[TIAB] OR "[Cichlasoma](https://pt.wikipedia.org/w/index.php?title=Cichlasoma&action=edit&redlink=1)"[TIAB] OR "[Cleithracara](https://pt.wikipedia.org/w/index.php?title=Cleithracara&action=edit&redlink=1)"[TIAB] OR "[Congochromis](https://pt.wikipedia.org/w/index.php?title=Congochromis&action=edit&redlink=1)"[TIAB] OR "[Copadichromis](https://pt.wikipedia.org/wiki/Copadichromis)"[TIAB] OR "[Corematodus](https://pt.wikipedia.org/w/index.php?title=Corematodus&action=edit&redlink=1)"[TIAB] OR "[Crenicara](https://pt.wikipedia.org/w/index.php?title=Crenicara&action=edit&redlink=1)"[TIAB] OR "Crenicichla"[TIAB] OR "[Ctenochromis](https://pt.wikipedia.org/w/index.php?title=Ctenochromis&action=edit&redlink=1)"[TIAB] OR "[Ctenopharynx](https://pt.wikipedia.org/w/index.php?title=Ctenopharynx&action=edit&redlink=1)"[TIAB] OR "Cunningtonia"[TIAB] OR "[Cyathochromis](https://pt.wikipedia.org/w/index.php?title=Cyathochromis&action=edit&redlink=1)"[TIAB] OR "[Cyathopharynx](https://pt.wikipedia.org/w/index.php?title=Cyathopharynx&action=edit&redlink=1)"[TIAB] OR "[Cyclopharynx](https://pt.wikipedia.org/w/index.php?title=Cyclopharynx&action=edit&redlink=1)"[TIAB] OR "[Cynotilapia](https://pt.wikipedia.org/w/index.php?title=Cynotilapia&action=edit&redlink=1)"[TIAB] OR "[Cyphotilapia](https://pt.wikipedia.org/w/index.php?title=Cyphotilapia&action=edit&redlink=1)"[TIAB] OR "[Cyprichromis](https://pt.wikipedia.org/w/index.php?title=Cyprichromis&action=edit&redlink=1)"[TIAB] OR "[Cyrtocara](https://pt.wikipedia.org/w/index.php?title=Cyrtocara&action=edit&redlink=1)"[TIAB] OR "[Danakilia](https://pt.wikipedia.org/wiki/Danakilia)"[TIAB] OR "[Dicrossus](https://pt.wikipedia.org/w/index.php?title=Dicrossus&action=edit&redlink=1)"[TIAB] OR "[Dimidiochromis](https://pt.wikipedia.org/w/index.php?title=Dimidiochromis&action=edit&redlink=1)"[TIAB] OR "[Diplotaxodon](https://pt.wikipedia.org/w/index.php?title=Diplotaxodon&action=edit&redlink=1)"[TIAB] OR "[Divandu](https://pt.wikipedia.org/w/index.php?title=Divandu&action=edit&redlink=1)"[TIAB] OR "[Docimodus](https://pt.wikipedia.org/w/index.php?title=Docimodus&action=edit&redlink=1)"[TIAB] OR "[Eclectochromis](https://pt.wikipedia.org/w/index.php?title=Eclectochromis&action=edit&redlink=1)"[TIAB] OR "Ectodus"[TIAB] OR "[Eretmodus](https://pt.wikipedia.org/w/index.php?title=Eretmodus&action=edit&redlink=1)"[TIAB] OR "[Etia](https://pt.wikipedia.org/wiki/Etia)"[TIAB] OR "[Etroplus](https://pt.wikipedia.org/w/index.php?title=Etroplus&action=edit&redlink=1)"[TIAB] OR "[Exochochromis](https://pt.wikipedia.org/w/index.php?title=Exochochromis&action=edit&redlink=1)"[TIAB] OR "[Fossorochromis](https://pt.wikipedia.org/w/index.php?title=Fossorochromis&action=edit&redlink=1)"[TIAB] OR "[Genyochromis](https://pt.wikipedia.org/wiki/Genyochromis)"[TIAB] OR "[Geophagus](https://pt.wikipedia.org/w/index.php?title=Geophagus&action=edit&redlink=1)"[TIAB] OR "[Gephyrochromis](https://pt.wikipedia.org/w/index.php?title=Gephyrochromis&action=edit&redlink=1)"[TIAB] OR "[Gnathochromis](https://pt.wikipedia.org/wiki/Gnathochromis)"[TIAB] OR "[Grammatotria](https://pt.wikipedia.org/w/index.php?title=Grammatotria&action=edit&redlink=1)"[TIAB] OR "[Greenwoodochromis](https://pt.wikipedia.org/w/index.php?title=Greenwoodochromis&action=edit&redlink=1)"[TIAB] OR "[Guianacara](https://pt.wikipedia.org/w/index.php?title=Guianacara&action=edit&redlink=1)"[TIAB] OR "[Gymnogeophagus](https://pt.wikipedia.org/w/index.php?title=Gymnogeophagus&action=edit&redlink=1)"[TIAB] OR "[Haplochromis](https://pt.wikipedia.org/wiki/Haplochromis)"[TIAB] OR "[Haplotaxodon](https://pt.wikipedia.org/wiki/Haplotaxodon)"[TIAB] OR "[Hemibates](https://pt.wikipedia.org/w/index.php?title=Hemibates&action=edit&redlink=1)"[TIAB] OR "[Hemichromis](https://pt.wikipedia.org/w/index.php?title=Jewel_cichlid&action=edit&redlink=1)"[TIAB] OR "  [Hemitaeniochromis](https://pt.wikipedia.org/w/index.php?title=Hemitaeniochromis&action=edit&redlink=1)"[TIAB] OR "[Hemitilapia](https://pt.wikipedia.org/wiki/Hemitilapia)"[TIAB] OR "[Herichthys](https://pt.wikipedia.org/w/index.php?title=Herichthys&action=edit&redlink=1)"[TIAB] OR "[Heros](https://pt.wikipedia.org/w/index.php?title=Heros_genus&action=edit&redlink=1)"[TIAB] OR "[Herotilapia](https://pt.wikipedia.org/w/index.php?title=Herotilapia&action=edit&redlink=1)"[TIAB] OR "[Heterochromis](https://pt.wikipedia.org/w/index.php?title=Heterochromis&action=edit&redlink=1)"[TIAB] OR "[Hoplarchus](https://pt.wikipedia.org/w/index.php?title=Hoplarchus&action=edit&redlink=1)"[TIAB] OR "[Hoplotilapia](https://pt.wikipedia.org/w/index.php?title=Hoplotilapia&action=edit&redlink=1)"[TIAB] OR "[Hypselecara](https://pt.wikipedia.org/w/index.php?title=Hypselecara&action=edit&redlink=1)"[TIAB] OR "[Hypsophrys](https://pt.wikipedia.org/w/index.php?title=Hypsophrys&action=edit&redlink=1)"[TIAB] OR "[Interochromis](https://pt.wikipedia.org/w/index.php?title=Interochromis&action=edit&redlink=1)"[TIAB] OR "[Iodotropheus](https://pt.wikipedia.org/w/index.php?title=Iodotropheus&action=edit&redlink=1)"[TIAB] OR "[Iranocichla](https://pt.wikipedia.org/wiki/Iranocichla)"[TIAB] OR "[Ivanacara](https://pt.wikipedia.org/w/index.php?title=Ivanacara&action=edit&redlink=1)"[TIAB] OR "[Julidochromis](https://pt.wikipedia.org/w/index.php?title=Julidochromis&action=edit&redlink=1)"[TIAB] OR "[Katria](https://pt.wikipedia.org/w/index.php?title=Katria&action=edit&redlink=1)"[TIAB] OR "[Konia](https://pt.wikipedia.org/w/index.php?title=Konia_(genus)&action=edit&redlink=1)"[TIAB] OR "[Krobia](https://pt.wikipedia.org/w/index.php?title=Krobia_(genus)&action=edit&redlink=1)"[TIAB] OR "[Labeotropheus](https://pt.wikipedia.org/w/index.php?title=Labeotropheus&action=edit&redlink=1)"[TIAB] OR "[Labidochromis](https://pt.wikipedia.org/wiki/Labidochromis)"[TIAB] OR "[Labrochromis](https://pt.wikipedia.org/w/index.php?title=Labrochromis&action=edit&redlink=1)"[TIAB] OR "[Laetacara](https://pt.wikipedia.org/w/index.php?title=Laetacara&action=edit&redlink=1)"[TIAB] OR "[Lamprologus](https://pt.wikipedia.org/w/index.php?title=Lamprologus&action=edit&redlink=1)"[TIAB] OR "[Lepidiolamprologus](https://pt.wikipedia.org/w/index.php?title=Lepidiolamprologus&action=edit&redlink=1)"[TIAB] OR "[Lestradea](https://pt.wikipedia.org/wiki/Lestradea)"[TIAB] OR "[Lethrinops](https://pt.wikipedia.org/wiki/Lethrinops)"[TIAB] OR "[Lichnochromis](https://pt.wikipedia.org/wiki/Lichnochromis)"[TIAB] OR "[Limbochromis](https://pt.wikipedia.org/w/index.php?title=Limbochromis&action=edit&redlink=1)"[TIAB] OR "Limnochromis"[TIAB] OR "[Limnotilapia](https://pt.wikipedia.org/wiki/Limnotilapia)"[TIAB] OR "[Lipochromis](https://pt.wikipedia.org/wiki/Lipochromis)"[TIAB] OR "[Lithochromis](https://pt.wikipedia.org/wiki/Lithochromis)"[TIAB] OR "[Lobochilotes](https://pt.wikipedia.org/wiki/Lobochilotes)"[TIAB] OR "[Macropleurodus](https://pt.wikipedia.org/wiki/Macropleurodus)"[TIAB] OR "[Maylandia](https://pt.wikipedia.org/w/index.php?title=Maylandia&action=edit&redlink=1)"[TIAB] OR "[Mazarunia](https://pt.wikipedia.org/w/index.php?title=Mazarunia&action=edit&redlink=1)"[TIAB] OR "[Mbipia](https://pt.wikipedia.org/wiki/Mbipia)"[TIAB] OR "[Mchenga](https://pt.wikipedia.org/w/index.php?title=Mchenga&action=edit&redlink=1)"[TIAB] OR "[Melanochromis](https://pt.wikipedia.org/wiki/Melanochromis)"[TIAB] OR "[Mesonauta](https://pt.wikipedia.org/w/index.php?title=Mesonauta&action=edit&redlink=1)"[TIAB] OR "[Microchromis](https://pt.wikipedia.org/w/index.php?title=Microchromis&action=edit&redlink=1)"[TIAB] OR "[Mikrogeophagus](https://pt.wikipedia.org/w/index.php?title=Mikrogeophagus&action=edit&redlink=1)"[TIAB] OR "[Myaka](https://pt.wikipedia.org/wiki/Myaka)"[TIAB] OR "[Mylacochromis](https://pt.wikipedia.org/w/index.php?title=Mylacochromis&action=edit&redlink=1)"[TIAB] OR "[Mylochromis](https://pt.wikipedia.org/wiki/Mylochromis)"[TIAB] OR "[Naevochromis](https://pt.wikipedia.org/wiki/Naevochromis)"[TIAB] OR "[Nandopsis](https://pt.wikipedia.org/w/index.php?title=Nandopsis&action=edit&redlink=1)"[TIAB] OR "[Nannacara](https://pt.wikipedia.org/w/index.php?title=Nannacara&action=edit&redlink=1)"[TIAB] OR "[Nanochromis](https://pt.wikipedia.org/w/index.php?title=Nanochromis&action=edit&redlink=1)"[TIAB] OR "[Neetroplus](https://pt.wikipedia.org/w/index.php?title=Neetroplus&action=edit&redlink=1)"[TIAB] OR "[Neochromis](https://pt.wikipedia.org/wiki/Neochromis)"[TIAB] OR "[Neolamprologus](https://pt.wikipedia.org/wiki/Neolamprologus)"[TIAB] OR "[Nimbochromis](https://pt.wikipedia.org/w/index.php?title=Nimbochromis&action=edit&redlink=1)"[TIAB] OR "[Nyassachromis](https://pt.wikipedia.org/wiki/Nyassachromis)"[TIAB] OR "[Ophthalmotilapia](https://pt.wikipedia.org/w/index.php?title=Ophthalmotilapia&action=edit&redlink=1)"[TIAB] OR "[Oreochromis](https://pt.wikipedia.org/wiki/Oreochromis)"[TIAB] OR "[Orthochromis](https://pt.wikipedia.org/wiki/Orthochromis)"[TIAB] OR "[Otopharynx](https://pt.wikipedia.org/w/index.php?title=Otopharynx&action=edit&redlink=1)"[TIAB] OR "[Oxylapia](https://pt.wikipedia.org/wiki/Oxylapia)"[TIAB] OR "[Pallidochromis](https://pt.wikipedia.org/wiki/Pallidochromis)"[TIAB] OR "[Parachromis](https://pt.wikipedia.org/w/index.php?title=Parachromis&action=edit&redlink=1)"[TIAB] OR "[Paracyprichromis](https://pt.wikipedia.org/w/index.php?title=Paracyprichromis&action=edit&redlink=1)"[TIAB] OR "[Paralabidochromis](https://pt.wikipedia.org/wiki/Paralabidochromis)"[TIAB] OR "[Parananochromis](https://pt.wikipedia.org/w/index.php?title=Parananochromis&action=edit&redlink=1)"[TIAB] OR "[Paraneetroplus](https://pt.wikipedia.org/w/index.php?title=Paraneetroplus&action=edit&redlink=1)"[TIAB] OR "[Paratilapia](https://pt.wikipedia.org/w/index.php?title=Paratilapia&action=edit&redlink=1)"[TIAB] OR "[Paretroplus](https://pt.wikipedia.org/wiki/Paretroplus)"[TIAB] OR "[Pelmatochromis](https://pt.wikipedia.org/w/index.php?title=Pelmatochromis&action=edit&redlink=1)"[TIAB] OR "[Pelvicachromis](https://pt.wikipedia.org/wiki/Pelvicachromis)"[TIAB] OR "Perissodus"[TIAB] OR "[Petenia](https://pt.wikipedia.org/w/index.php?title=Petenia&action=edit&redlink=1)"[TIAB] OR "[Petrochromis](https://pt.wikipedia.org/w/index.php?title=Petrochromis&action=edit&redlink=1)"[TIAB] OR "[Petrotilapia](https://pt.wikipedia.org/wiki/Petrotilapia)"[TIAB] OR "[Pharyngochromis](https://pt.wikipedia.org/w/index.php?title=Pharyngochromis&action=edit&redlink=1)"[TIAB] OR "[Placidochromis](https://pt.wikipedia.org/wiki/Placidochromis)"[TIAB] OR "[Platytaeniodus](https://pt.wikipedia.org/wiki/Platytaeniodus)"[TIAB] OR "[Plecodus](https://pt.wikipedia.org/wiki/Plecodus)"[TIAB] OR "[Prognathochromis](https://pt.wikipedia.org/wiki/Prognathochromis)"[TIAB] OR "[Protomelas](https://pt.wikipedia.org/w/index.php?title=Protomelas&action=edit&redlink=1)"[TIAB] OR "[Psammochromis](https://pt.wikipedia.org/w/index.php?title=Psammochromis&action=edit&redlink=1)"[TIAB] OR "[Pseudocrenilabrus](https://pt.wikipedia.org/w/index.php?title=Pseudocrenilabrus&action=edit&redlink=1)"[TIAB] OR "[Pseudosimochromis](https://pt.wikipedia.org/wiki/Pseudosimochromis)"[TIAB] OR "[Pseudotropheus](https://pt.wikipedia.org/wiki/Pseudotropheus)"[TIAB] OR "[Pterochromis](https://pt.wikipedia.org/w/index.php?title=Pterochromis&action=edit&redlink=1)"[TIAB] OR "[Pterophyllum](https://pt.wikipedia.org/wiki/Pterophyllum)"[TIAB] OR "[Ptychochromis](https://pt.wikipedia.org/wiki/Ptychochromis)"[TIAB] OR "[Ptychochromoides](https://pt.wikipedia.org/wiki/Ptychochromoides)"[TIAB] OR "[Ptyochromis](https://pt.wikipedia.org/wiki/Ptyochromis)"[TIAB] OR "[Pundamilia](https://pt.wikipedia.org/wiki/Pundamilia)"[TIAB] OR "[Pungu](https://pt.wikipedia.org/w/index.php?title=Pungu&action=edit&redlink=1)"[TIAB] OR "[Pyxichromis](https://pt.wikipedia.org/wiki/Pyxichromis)"[TIAB] OR "[Reganochromis](https://pt.wikipedia.org/w/index.php?title=Reganochromis&action=edit&redlink=1)"[TIAB] OR "[Retroculus](https://pt.wikipedia.org/w/index.php?title=Retroculus&action=edit&redlink=1)"[TIAB] OR "[Rhamphochromis](https://pt.wikipedia.org/w/index.php?title=Rhamphochromis&action=edit&redlink=1)"[TIAB] OR "[Sargochromis](https://pt.wikipedia.org/w/index.php?title=Sargochromis&action=edit&redlink=1)"[TIAB] OR "[Sarotherodon](https://pt.wikipedia.org/wiki/Sarotherodon)"[TIAB] OR "[Satanoperca](https://pt.wikipedia.org/w/index.php?title=Satanoperca&action=edit&redlink=1)"[TIAB] OR "[Schubotzia](https://pt.wikipedia.org/w/index.php?title=Schubotzia&action=edit&redlink=1)"[TIAB] OR "[Schwetzochromis](https://pt.wikipedia.org/w/index.php?title=Schwetzochromis&action=edit&redlink=1)"[TIAB] OR "[Sciaenochromis](https://pt.wikipedia.org/w/index.php?title=Sciaenochromis&action=edit&redlink=1)"[TIAB] OR "[Serranochromis](https://pt.wikipedia.org/wiki/Serranochromis)"[TIAB] OR "[Simochromis](https://pt.wikipedia.org/wiki/Simochromis)"[TIAB] OR "[Spathodus](https://pt.wikipedia.org/w/index.php?title=Spathodus&action=edit&redlink=1)"[TIAB] OR "[Steatocranus](https://pt.wikipedia.org/wiki/Steatocranus)"[TIAB] OR "[Stigmatochromis](https://pt.wikipedia.org/wiki/Stigmatochromis)"[TIAB] OR "[Stomatepia](https://pt.wikipedia.org/wiki/Stomatepia)"[TIAB] OR "[Symphysodon](https://pt.wikipedia.org/wiki/Symphysodon)"[TIAB] OR "[Taeniacara](https://pt.wikipedia.org/w/index.php?title=Taeniacara&action=edit&redlink=1)"[TIAB] OR "[Taeniochromis](https://pt.wikipedia.org/wiki/Taeniochromis)"[TIAB] OR "[Taeniolethrinops](https://pt.wikipedia.org/w/index.php?title=Taeniolethrinops&action=edit&redlink=1)"[TIAB] OR "[Tahuantinsuyoa](https://pt.wikipedia.org/w/index.php?title=Tahuantinsuyoa&action=edit&redlink=1)"[TIAB] OR "[Tangachromis](https://pt.wikipedia.org/wiki/Tangachromis)"[TIAB] OR "[Tanganicodus](https://pt.wikipedia.org/w/index.php?title=Tanganicodus&action=edit&redlink=1)"[TIAB] OR "[Teleocichla](https://pt.wikipedia.org/w/index.php?title=Teleocichla&action=edit&redlink=1)"[TIAB] OR "[Teleogramma](https://pt.wikipedia.org/wiki/Teleogramma)"[TIAB] OR "[Telmatochromis](https://pt.wikipedia.org/w/index.php?title=Telmatochromis&action=edit&redlink=1)"[TIAB] OR "[Theraps](https://pt.wikipedia.org/w/index.php?title=Theraps&action=edit&redlink=1)"[TIAB] OR "[Thoracochromis](https://pt.wikipedia.org/w/index.php?title=Thoracochromis&action=edit&redlink=1)"[TIAB] OR "[Thorichthys](https://pt.wikipedia.org/w/index.php?title=Thorichthys&action=edit&redlink=1)"[TIAB] OR "[Thysochromis](https://pt.wikipedia.org/w/index.php?title=Thysochromis&action=edit&redlink=1)"[TIAB] OR "[Tilapia](https://pt.wikipedia.org/w/index.php?title=Tilapia_(genus)&action=edit&redlink=1)"[TIAB] OR "[Tomocichla](https://pt.wikipedia.org/w/index.php?title=Tomocichla&action=edit&redlink=1)"[TIAB] OR "[Tramitichromis](https://pt.wikipedia.org/wiki/Tramitichromis)"[TIAB] OR "[Trematocara](https://pt.wikipedia.org/wiki/Trematocara)"[TIAB] OR "[Trematocranus](https://pt.wikipedia.org/wiki/Trematocranus)"[TIAB] OR "[Triglachromis](https://pt.wikipedia.org/wiki/Triglachromis)"[TIAB] OR "[Tristramella](https://pt.wikipedia.org/wiki/Tristramella)"[TIAB] OR "[Tridontochromis](https://pt.wikipedia.org/w/index.php?title=Tridontochromis&action=edit&redlink=1)"[TIAB] OR "[Tropheops](https://pt.wikipedia.org/wiki/Tropheops)"[TIAB] OR "[Tropheus](https://pt.wikipedia.org/w/index.php?title=Tropheus&action=edit&redlink=1)"[TIAB] OR "[Tylochromis](https://pt.wikipedia.org/wiki/Tylochromis)"[TIAB] OR "[Tyrannochromis](https://pt.wikipedia.org/wiki/Tyrannochromis)"[TIAB] OR "[Uaru](https://pt.wikipedia.org/w/index.php?title=Uaru&action=edit&redlink=1)"[TIAB] OR "[Variabilichromis](https://pt.wikipedia.org/w/index.php?title=Variabilichromis&action=edit&redlink=1)"[TIAB] OR "[Vieja](https://pt.wikipedia.org/w/index.php?title=Vieja&action=edit&redlink=1)"[TIAB] OR "[Xenochromis](https://pt.wikipedia.org/wiki/Xenochromis)"[TIAB] OR "[Xenotilapia](https://pt.wikipedia.org/w/index.php?title=Xenotilapia&action=edit&redlink=1)"[TIAB] OR "[Xystichromis](https://pt.wikipedia.org/wiki/Xystichromis)"[TIAB]) | ("liver"[MeSH Terms] OR "liver"[TIAB] OR "livers"[TIAB] OR "hepatic cell"[TIAB] OR "hepatic"[TIAB] OR "hepatic cells"[TIAB] OR "cell, hepatic"[TIAB] OR "cells, hepatic"[TIAB] OR "gills"[MeSH Terms] OR "gill"[TIAB] OR "gills"[TIAB] OR "lamella"[TIAB] OR "lamella primary"[TIAB] OR "primary, lamella"[TIAB] OR "secondary, lamella"[TIAB] OR "lamella secondary"[TIAB] OR "gill arch"[TIAB] OR "gill filaments"[TIAB] OR "filaments, gill"[TIAB] OR "gill filament"[TIAB] OR "filament, gill"[TIAB] OR "chloride cells"[TIAB] OR "branchial epithelium"[TIAB] OR "epithelial"[TIAB] OR "mucous cells"[TIAB] OR "lamina propria"[TIAB] OR "gill filaments"[TIAB] OR "foregut"[TIAB] OR "hingut"[TIAB] OR "mucous cells" [TIAB] OR "gill filament"[TIAB] OR "filaments, gill"[TIAB] OR "filament, gill"[TIAB] OR "primary lamella"[TIAB] OR "secondary lamella"[TIAB] OR "bioconcentration"[TIAB] OR "bioaccumulation"[TIAB]) |
